# Supplementary material for: Investigation on the Antifungal Ingredients of Saccharothrix Yanglingensis Hhs.015, an Antagonistic Endophytic Actinomycete Isolated from Cucumber Plant
Source: PubMed Central journal article supplement (PMC6833113; doi:10.3390/molecules24203686), 2019-10-13
Supplement: molecules-24-03686-s001.pdf [file molecules-24-03686-s001.pdf]

Supplementary Materials

# Investigation on the Antifungal Ingredients of *Saccharothrix Yanglingensis* Hhs.015, an Antagonistic Endophytic Actinomycete Isolated from Cucumber Plant

Hua Wang, Runze Tian, Qizhen Tian, Xia Yan, Lili Huang \* and Zhiqin Ji \*

State Key Laboratory of Crop Stress Biology for Arid Areas and College of Plant Protection, Northwest A&F University, Yangling, Shaanxi 712100, China; wangh619@foxmail.com (H.W.), tianrz2009@163.com (R.T.), bwcxzsqx@163.com (Q.T.), luckyx@126.com (X.Y.)

\* Correspondence: jizhiqin@nwsuaf.edu.cn (Z.J.); huanglili@nwsuaf.edu.cn (L.H.);  
Tel.: +86-15309203829 (Z.J.); +86-029-87091312 (L.H.)

Received: 16 September 2019; Accepted: 11 October 2019; Published: 12 October 2019  
Academic Editor: Isabel C.F.R. Ferreira

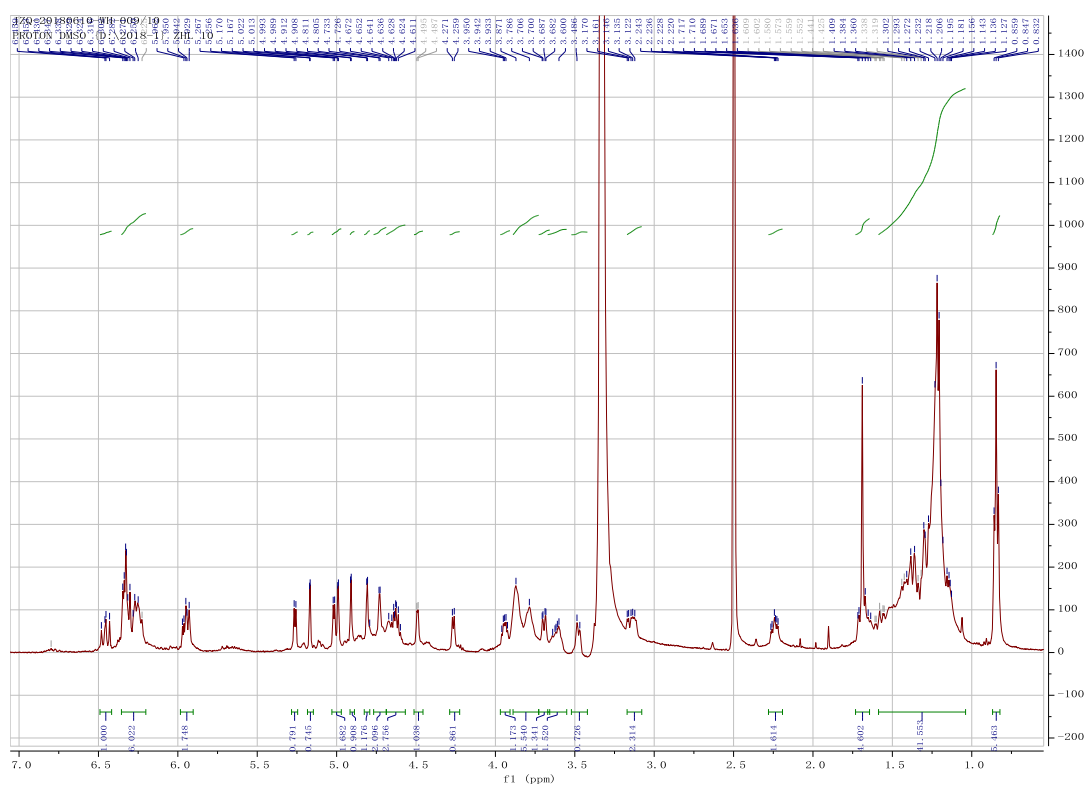

Figure 1.  $^1\text{H}$  NMR spectrum of WH02 (500 MHz,  $\text{DMSO-}d_6$ ).

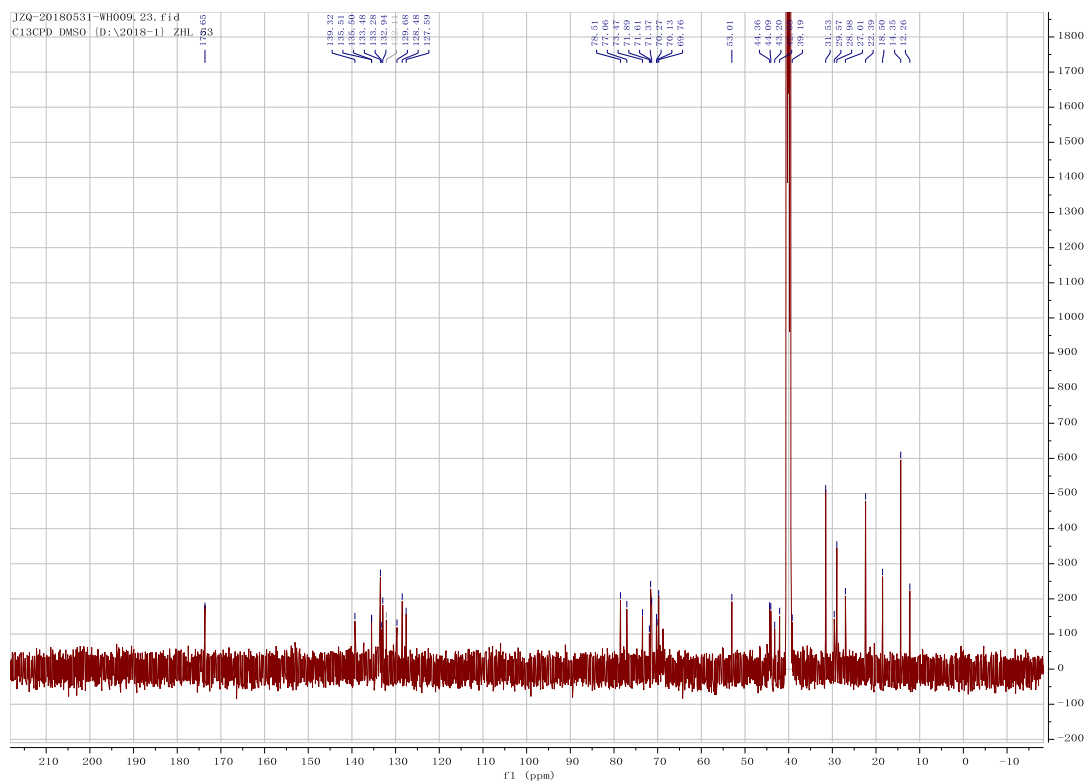

**Figure 2.**  $^{13}\text{C}$  NMR spectrum of WH02 (125 MHz,  $\text{DMSO}-d_6$ ).



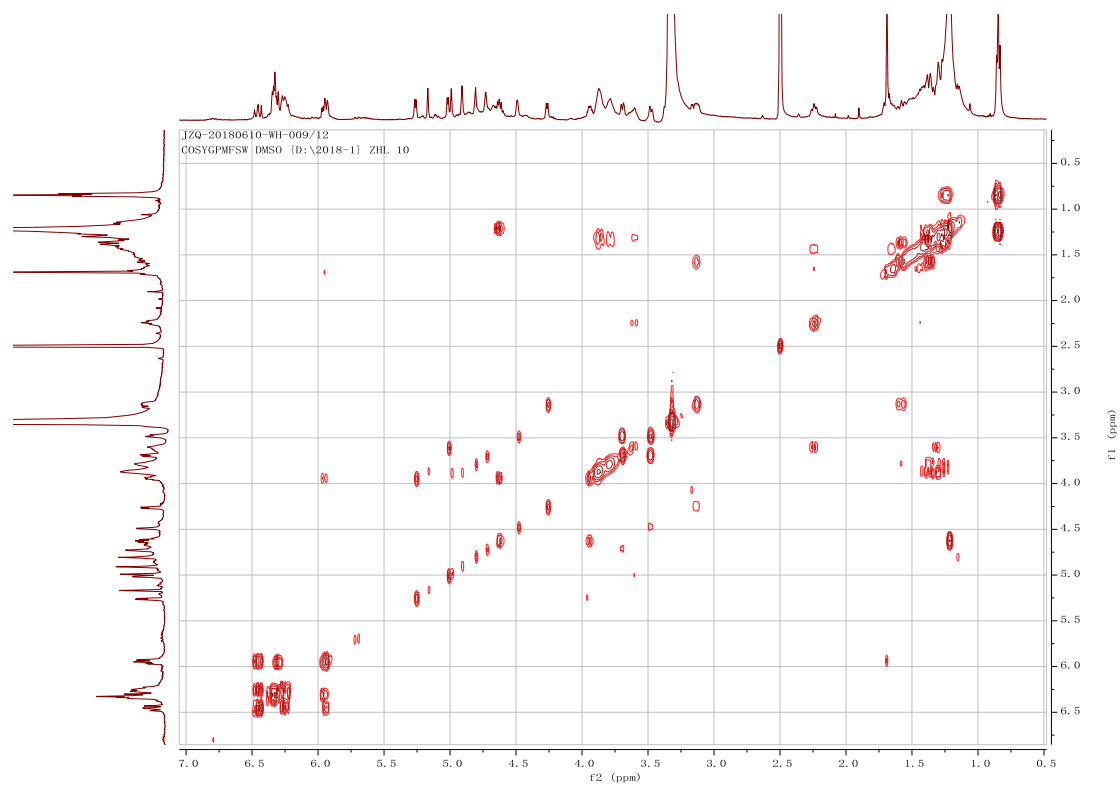

**Figure 4.**  $^1\text{H},^1\text{H}$ -COSY spectrum of WH02 (600 MHz,  $\text{DMSO-}d_6$ ).

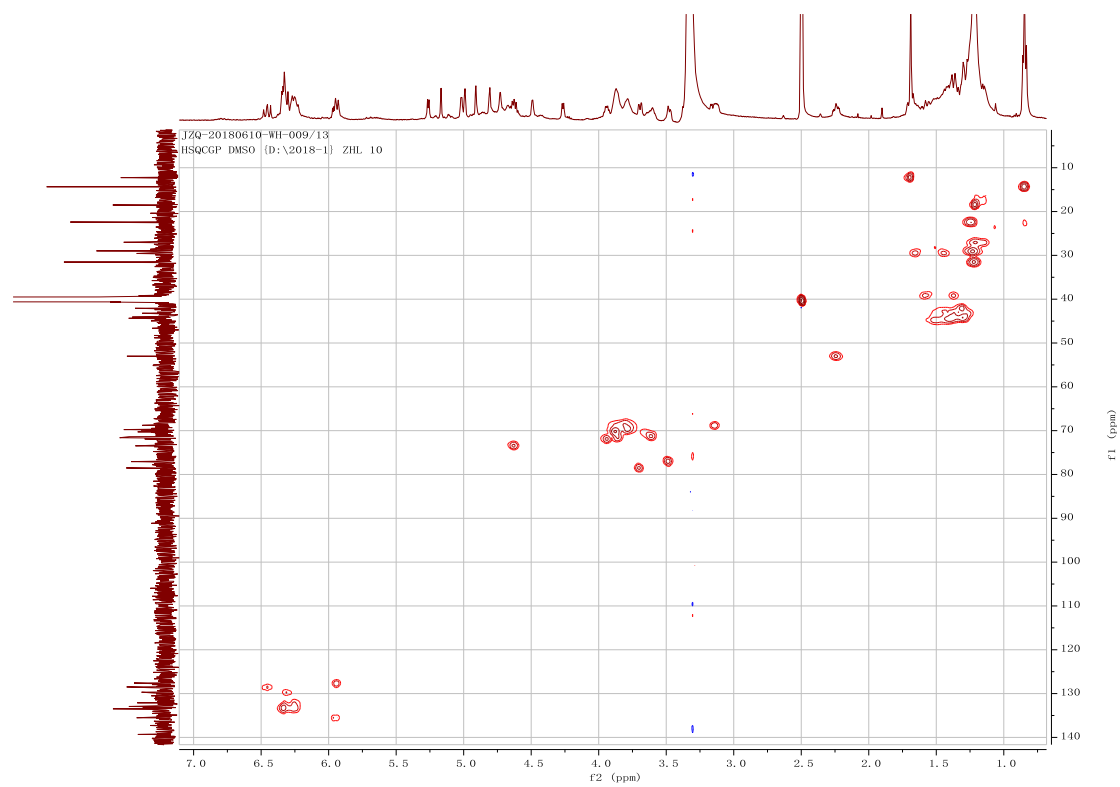

**Figure 5.** HSQC spectrum of WH02 (600 MHz, DMSO- $d_6$ ).

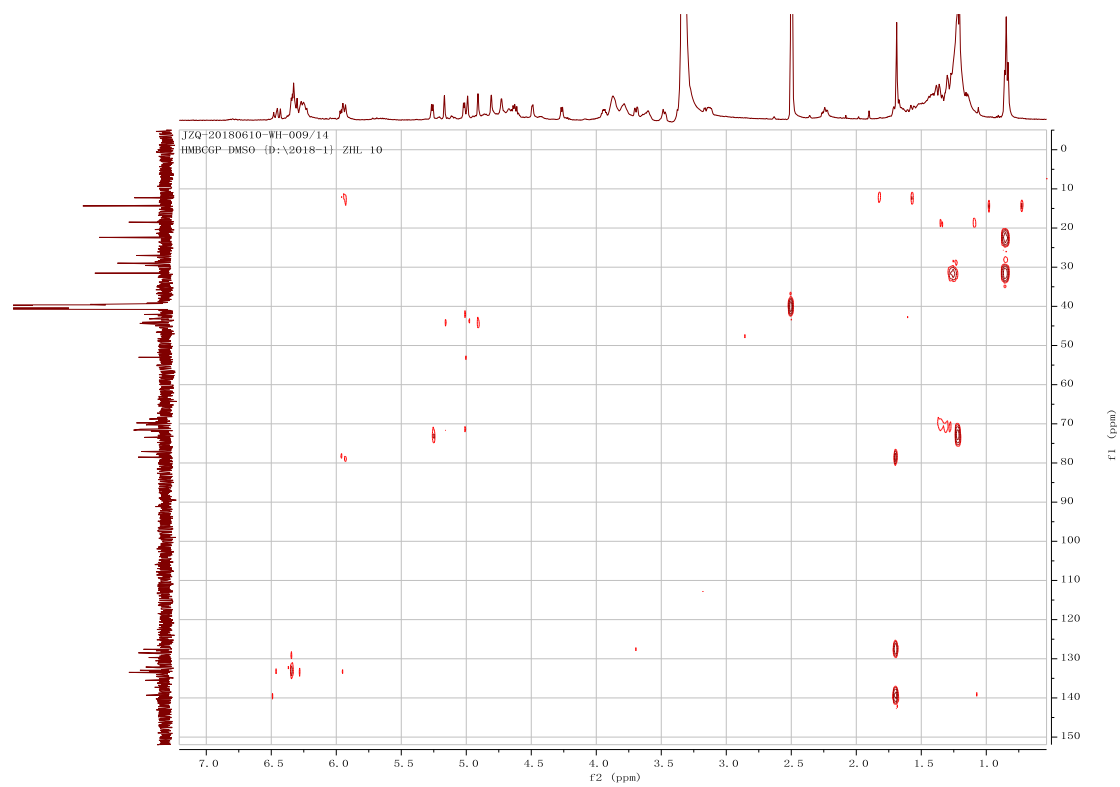

**Figure 6.** HMBC spectrum of WH02 (600 MHz, DMSO-*d*<sub>6</sub>).

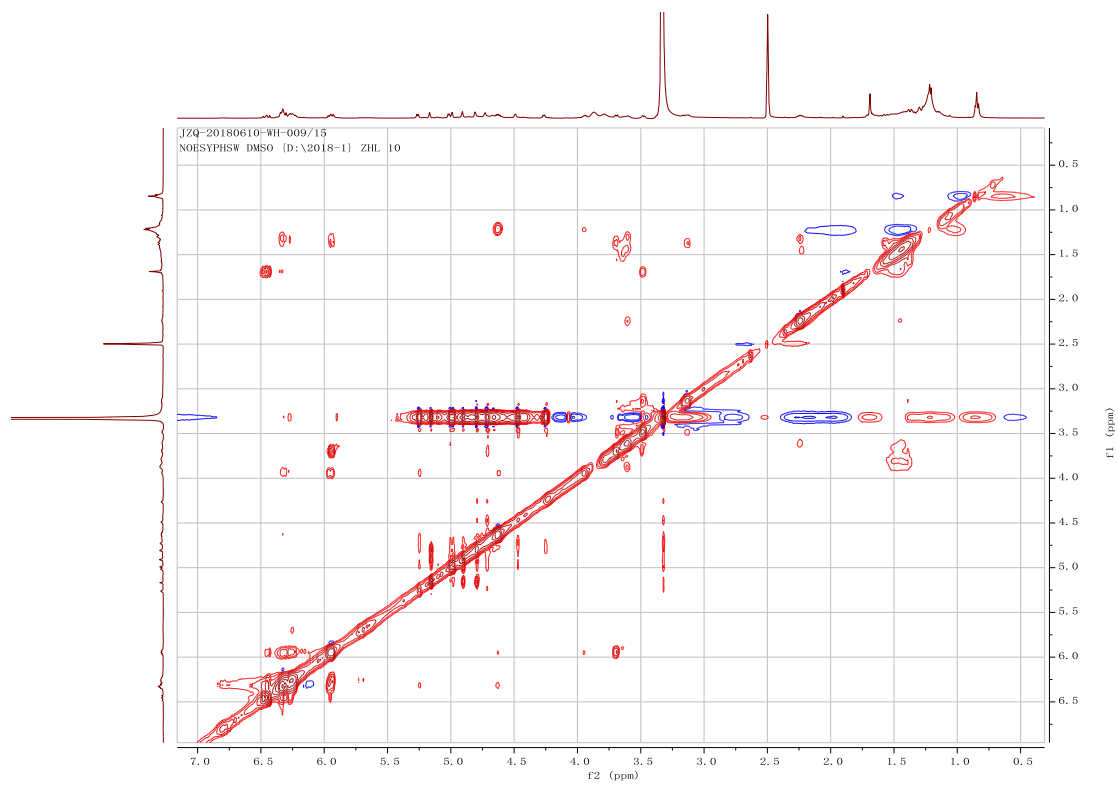

**Figure 7.** NOESY spectrum of WH02 (600 MHz, DMSO- $d_6$ ).



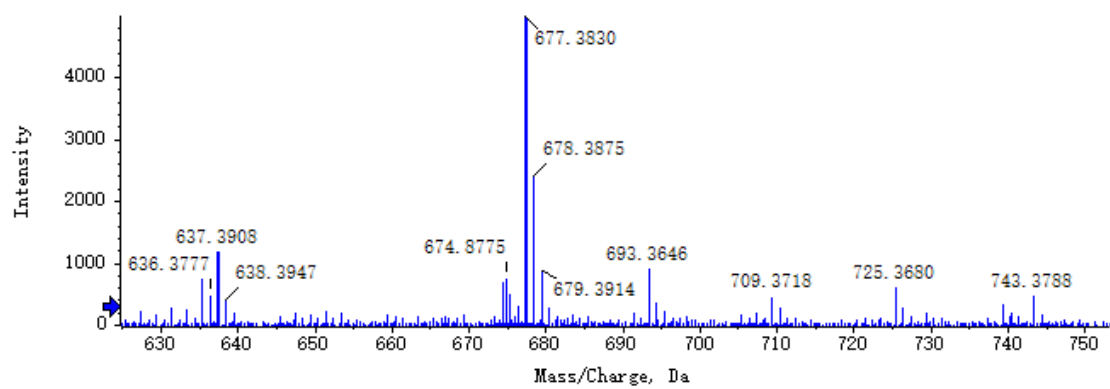

**Figure 8.** HRMS spectrum of WH02.
